# Supplementary material for: Effect of P144® (Anti-TGF-β) in an “In Vivo” Human Hypertrophic Scar Model in Nude Mice
Source: PubMed Central journal article supplement (PMC4697841; doi:10.1371/journal.pone.0144489), 2015-12-31
Supplement: pone.0144489.s001.pdf [file pone.0144489.s001.pdf]

| CASES      | Total Area | Collagen Area | Thickness |
|------------|------------|---------------|-----------|
| 1 Basal    | 3,959      | 2,289         | 1.515     |
| 1 Placebo  | 1.853      | 1.001         | 1.092     |
| 1 p144     | 1.153      | 0.995         | 0.695     |
| 2 Basal    | 6.035      | 4.11          | 2.016     |
| 2 Placebo  | 2.648      | 2.266         | 1.221     |
| 2 p144     | 1.301      | 0.785         | 0.862     |
| 3 Basal    | 4.423      | 3.117         | 1.404     |
| 3 Placebo  | 1.35       | 0.82          | 1.049     |
| 3 p144     | 1.941      | 1.675         | 1.08      |
| 4 Basal    | 1.24       | 1.132         | 0.923     |
| 4 Placebo  | 2.99       | 2.752         | 1.24      |
| 4 p144     | 4.696      | 4.456         | 1.789     |
| 5 Basal    | 1.42       | 0.989         | 1.243     |
| 5 Placebo  | 0.592      | 0.517         | 0.499     |
| 5 p144     | 0.531      | 0.357         | 0.411     |
| 6 Basal    | 6.035      | 4.863         | 2.042     |
| 6 Placebo  | 3.826      | 3.543         | 1.52      |
| 6 p144     | 2.941      | 2.204         | 1.341     |
| 7 Basal    | 7.159      | 4.609         | 2.413     |
| 7 Placebo  | 1.233      | 1.162         | 0.839     |
| 7 p144     | 1.276      | 0.26          | 0.859     |
| 8 Basal    | 5.343      | 4.711         | 1.816     |
| 8 Placebo  | 3.408      | 3.072         | 1.359     |
| 8 p144     | 2.246      | 1.677         | 1.268     |
| 9 Basal    | 4.935      | 3.512         | 1.784     |
| 9 Placebo  | 2.893      | 2.369         | 1.305     |
| 9 p144     | 1.674      | 1.22          | 0.914     |
| 10 Basal   | 2.853      | 2.487         | 1.188     |
| 10 Placebo | 0.723      | 0.466         | 0.645     |
| 10 p144    | 1.158      | 1.012         | 0.841     |
| 11 Basal   | 6.543      | 4.469         | 2.028     |
| 11 Placebo | 4.045      | 3.63          | 1.731     |
| 11 p144    | 4.504      | 3.955         | 1.529     |
| 12 Basal   | 4.787      | 3.401         | 1.792     |
| 12 Placebo | 3.54       | 3.127         | 1.102     |
| 12 p144    | 1.12       | 0.942         | 0.703     |
| 13 Basal   | 0.876      | 0.671         | 0.809     |
| 13 Placebo | 1.467      | 1.155         | 1.049     |
| 13 p144    | 6.082      | 4.786         | 2.483     |
| 14 Basal   | 3.979      | 3.206         | 1.336     |
| 14 Placebo | 0.334      | 0.299         | 0.405     |
| 14 p144    | 0.327      | 0.192         | 0.329     |
| 15 Basal   | 3.293      | 2.114         | 1.565     |
| 15 Placebo | 2.224      | 1.908         | 1.118     |
| 15 p144    | 3.04       | 2.853         | 1.369     |
| 16 Basal   | 1.192      | 0.832         | 1.081     |
| 16 Placebo | 2.899      | 2.74          | 1.146     |
| 16 p144    | 2.837      | 2.133         | 1.173     |
| 17 Basal   | 1.962      | 1.523         | 1.008     |
| 17 Placebo | 2.246      | 1.997         | 1.069     |
| 17 p144    | 1.704      | 1.342         | 1.073     |

|            |       |       |       |
|------------|-------|-------|-------|
| 18 Basal   | 0.805 | 0.498 | 0.843 |
| 18 Placebo | 0.903 | 0.496 | 0.681 |
| 18 p144    | 0.627 | 0.332 | 0.627 |
