# Supplementary material for: Effect of P144® (Anti-TGF-β) in an “In Vivo” Human Hypertrophic Scar Model in Nude Mice
Source: PubMed Central journal article supplement (PMC4697841; doi:10.1371/journal.pone.0144489), 2015-12-31
Supplement: pone.0144489.s002.pdf [file pone.0144489.s002.pdf]

| CASES      | Collagen I | Collagen III | Fibrillin-1 |
|------------|------------|--------------|-------------|
| 1 Basal    | 69.68      | 40.87        | 2.34        |
| 1 Placebo  | 83.81      | 19.87        | 19.83       |
| 1 p144     | 55.64      | 69.23        | 14.43       |
| 2 Basal    | 87.65      | 82.22        | 5.88        |
| 2 Placebo  | 34.17      | 45.12        | 36.28       |
| 2 p144     | 55.54      | 10.59        | 8.07        |
| 3 Basal    | 46.69      | 73.91        | 1.10        |
| 3 Placebo  | 64.17      | 73.10        | 45.10       |
| 3 p144     | 75.30      | 93.74        | 2.26        |
| 4 Basal    | 81.26      | 7.88         | 1.30        |
| 4 Placebo  | 51.56      | 86.16        | 41.79       |
| 4 p144     | 41.92      | 94.43        | 55.01       |
| 5 Basal    | 57.12      | 72.52        | 1.29        |
| 5 Placebo  | 78.76      | 15.04        | 56.35       |
| 5 p144     | 62.62      | 77.49        | 19.47       |
| 6 Basal    | 53.94      | 64.43        | 2.65        |
| 6 Placebo  | 48.78      | 60.71        | 43.30       |
| 6 p144     | 46.98      | 49.76        | 31.94       |
| 7 Basal    | 88.47      | 84.30        | 0.07        |
| 7 Placebo  | 58.11      | 71.06        | 47.51       |
| 7 p144     | 73.98      | 84.18        | 66.09       |
| 8 Basal    | 48.22      | 76.12        | 0.77        |
| 8 Placebo  | 35.56      | 52.91        | 37.77       |
| 8 p144     | 14.82      | 55.99        | 17.35       |
| 9 Basal    | 62.83      | 80.74        | 0.18        |
| 9 Placebo  | 48.39      | 54.97        | 28.84       |
| 9 p144     | 74.74      | 20.48        | 35.15       |
| 10 Basal   | 81.35      | 13.09        | 0.28        |
| 10 Placebo | 59.99      | 46.38        | 39.44       |
| 10 p144    | 40.25      | 50.24        | 44.37       |
| 11 Basal   | 84.90      | 86.33        | 0.19        |
| 11 Placebo | 44.16      | 77.43        | 33.67       |
| 11 p144    | 29.38      | 67.38        | 18.26       |
| 12 Basal   | 86.29      | 86.96        | 0.87        |
| 12 Placebo | 74.00      | 70.67        | 18.21       |
| 12 p144    | 76.98      | 76.49        | 30.14       |
| 13 Basal   | 74.57      | 84.66        | 0.98        |
| 13 Placebo | 59.70      | 79.69        | 64.72       |
| 13 p144    | 69.96      | 73.83        | 31.45       |
| 14 Basal   | 83.28      | 76.72        | 2.91        |
| 14 Placebo | 20.90      | 41.17        | 1.06        |
| 14 p144    | 23.89      | 25.70        | 30.88       |
| 15 Basal   | 89.46      | 73.75        | 2.82        |
| 15 Placebo | 26.85      | 60.29        | 27.99       |
| 15 p144    | 19.57      | 62.94        | 9.56        |
| 16 Basal   | 68.31      | 81.65        | 9.30        |
| 16 Placebo | 3.50       | 53.60        | 5.70        |
| 16 p144    | 25.52      | 77.49        | 31.70       |
| 17 Basal   | 71.70      | 81.55        | 0.60        |
| 17 Placebo | 59.59      | 79.92        | 9.31        |
| 17 p144    | 60.77      | 79.79        | 21.42       |

|            |       |       |       |
|------------|-------|-------|-------|
| 18 Basal   | 36.09 | 57.79 | 2.53  |
| 18 Placebo | 66.96 | 73.37 | 42.60 |
| 18 p144    | 59.37 | 54.25 | 31.82 |
